# Supplementary material
Source: ML conference proceedings conference paper supplement (https://openreview.net/forum?id=imIYm1ILm9)
Supplement: supplementary_material [file attachment]

## Sparse view 3D Scene Completion

### Optimization + Generation Problem

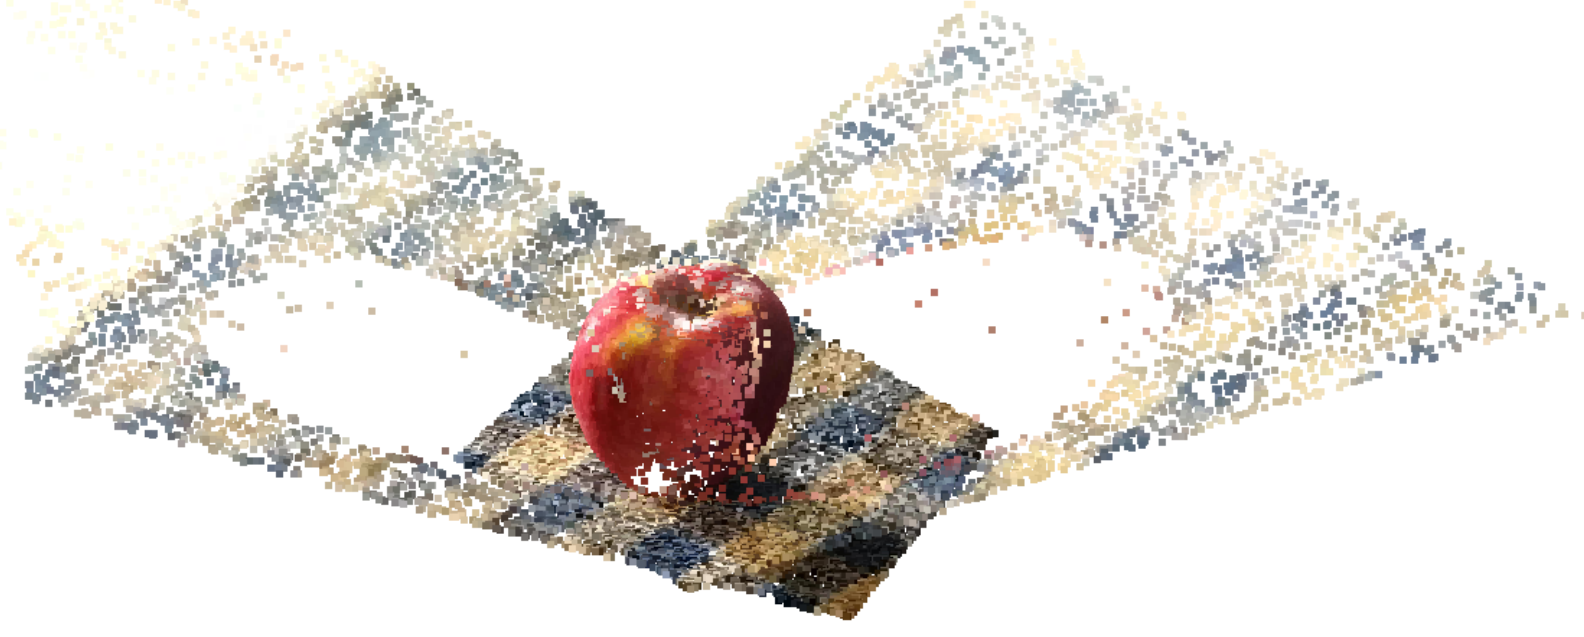

#### Existing 3DGS<sup>1</sup>-based methods:

- Easily **overfit** to input views
- Difficult to produce **extrapolated** views
- Refining can't fully leverage the **diffusion prior**

## Iterative Generation & Alignment

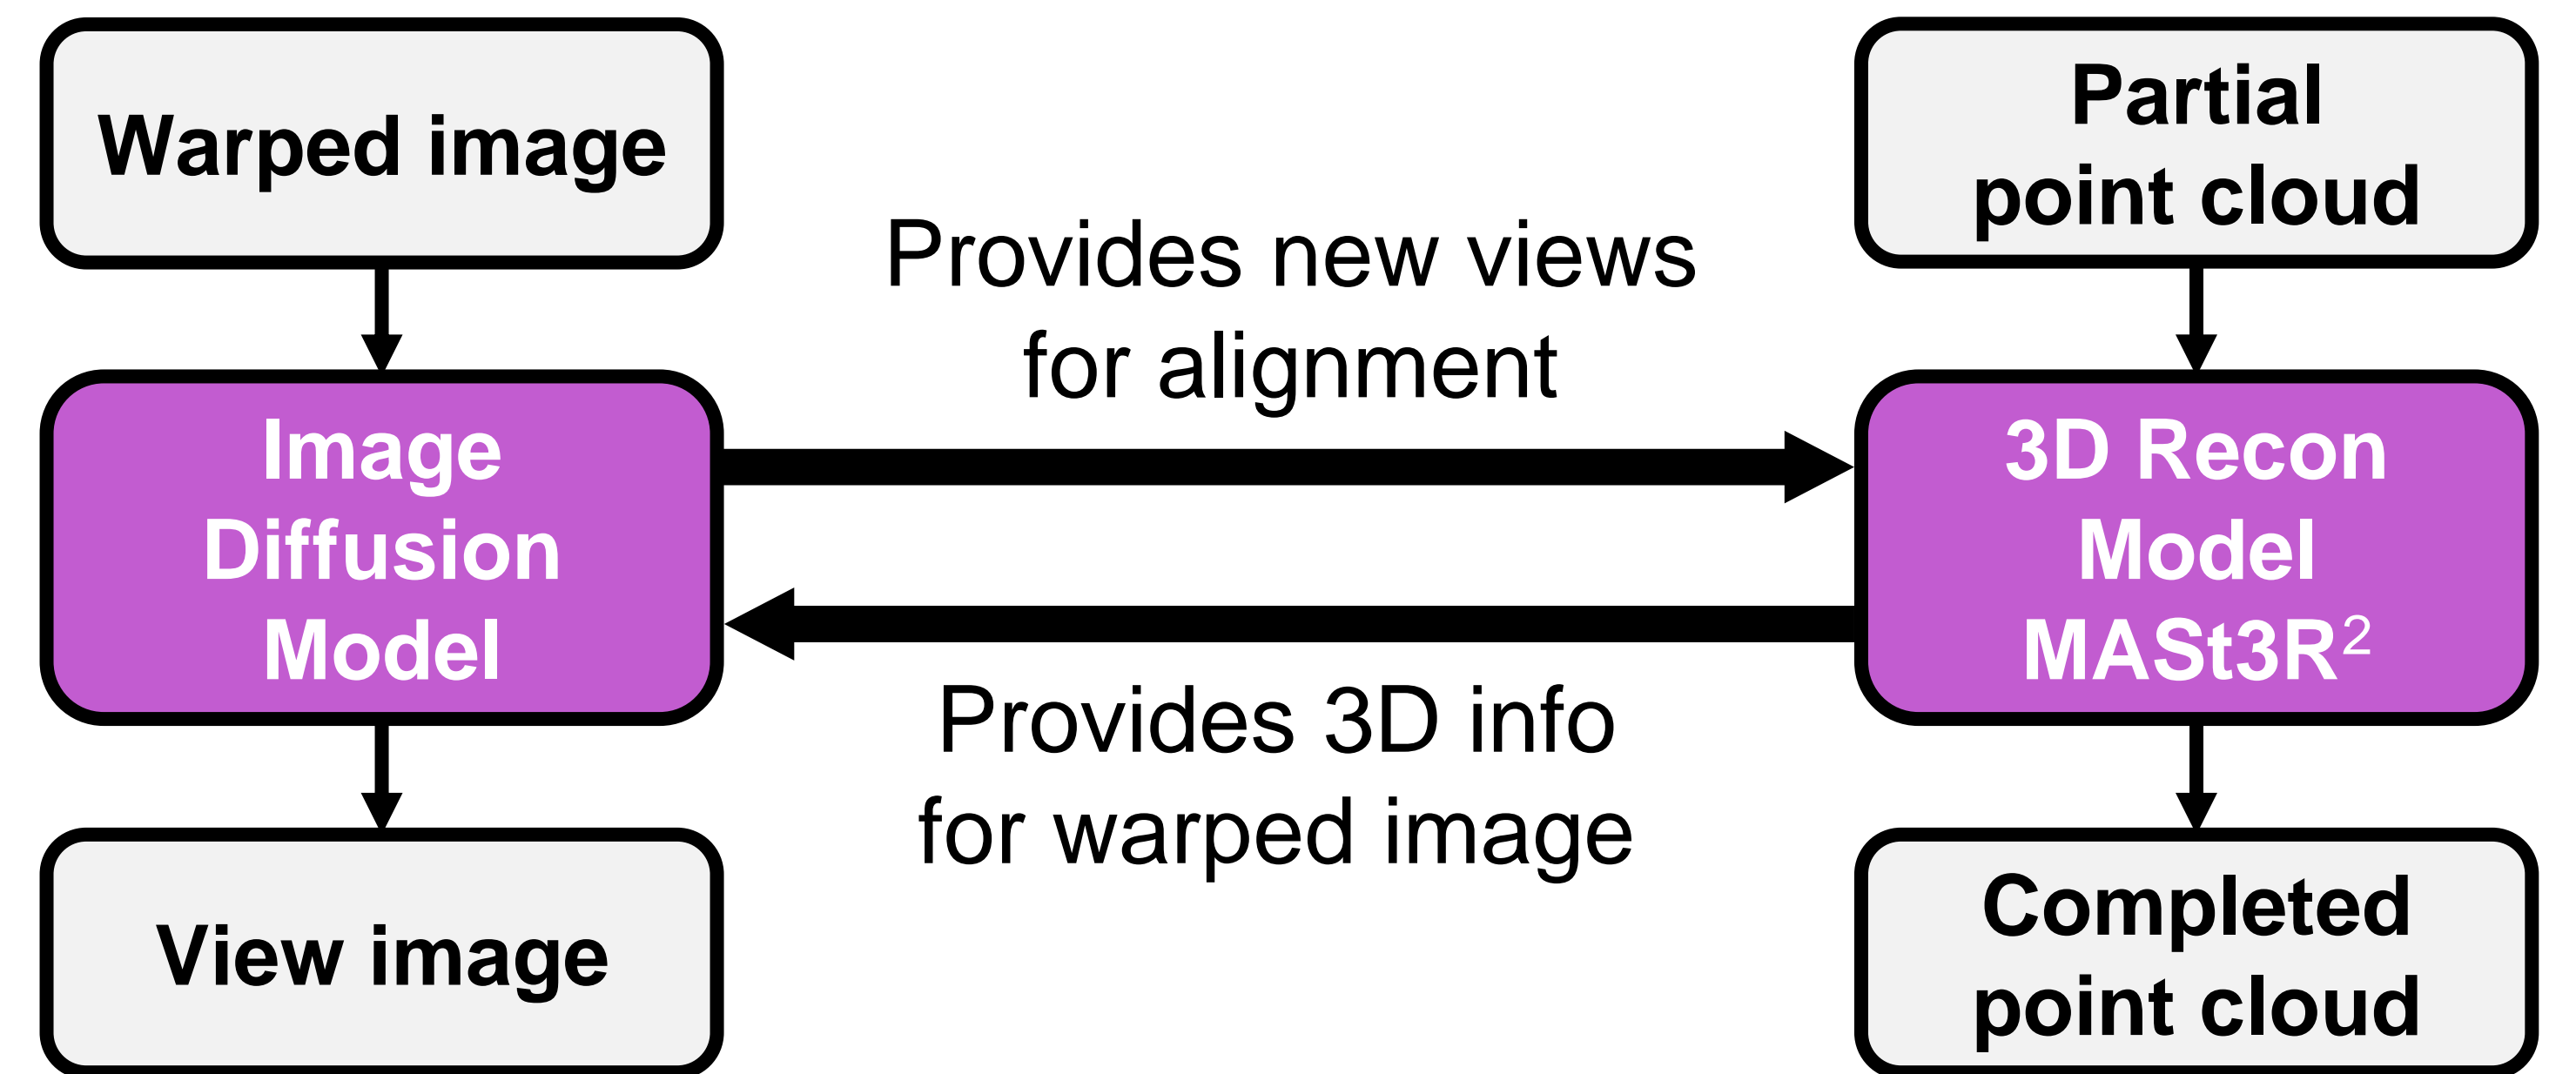

Ensure 3D Consistency & Realistic Extrapolation

## Proposed Method

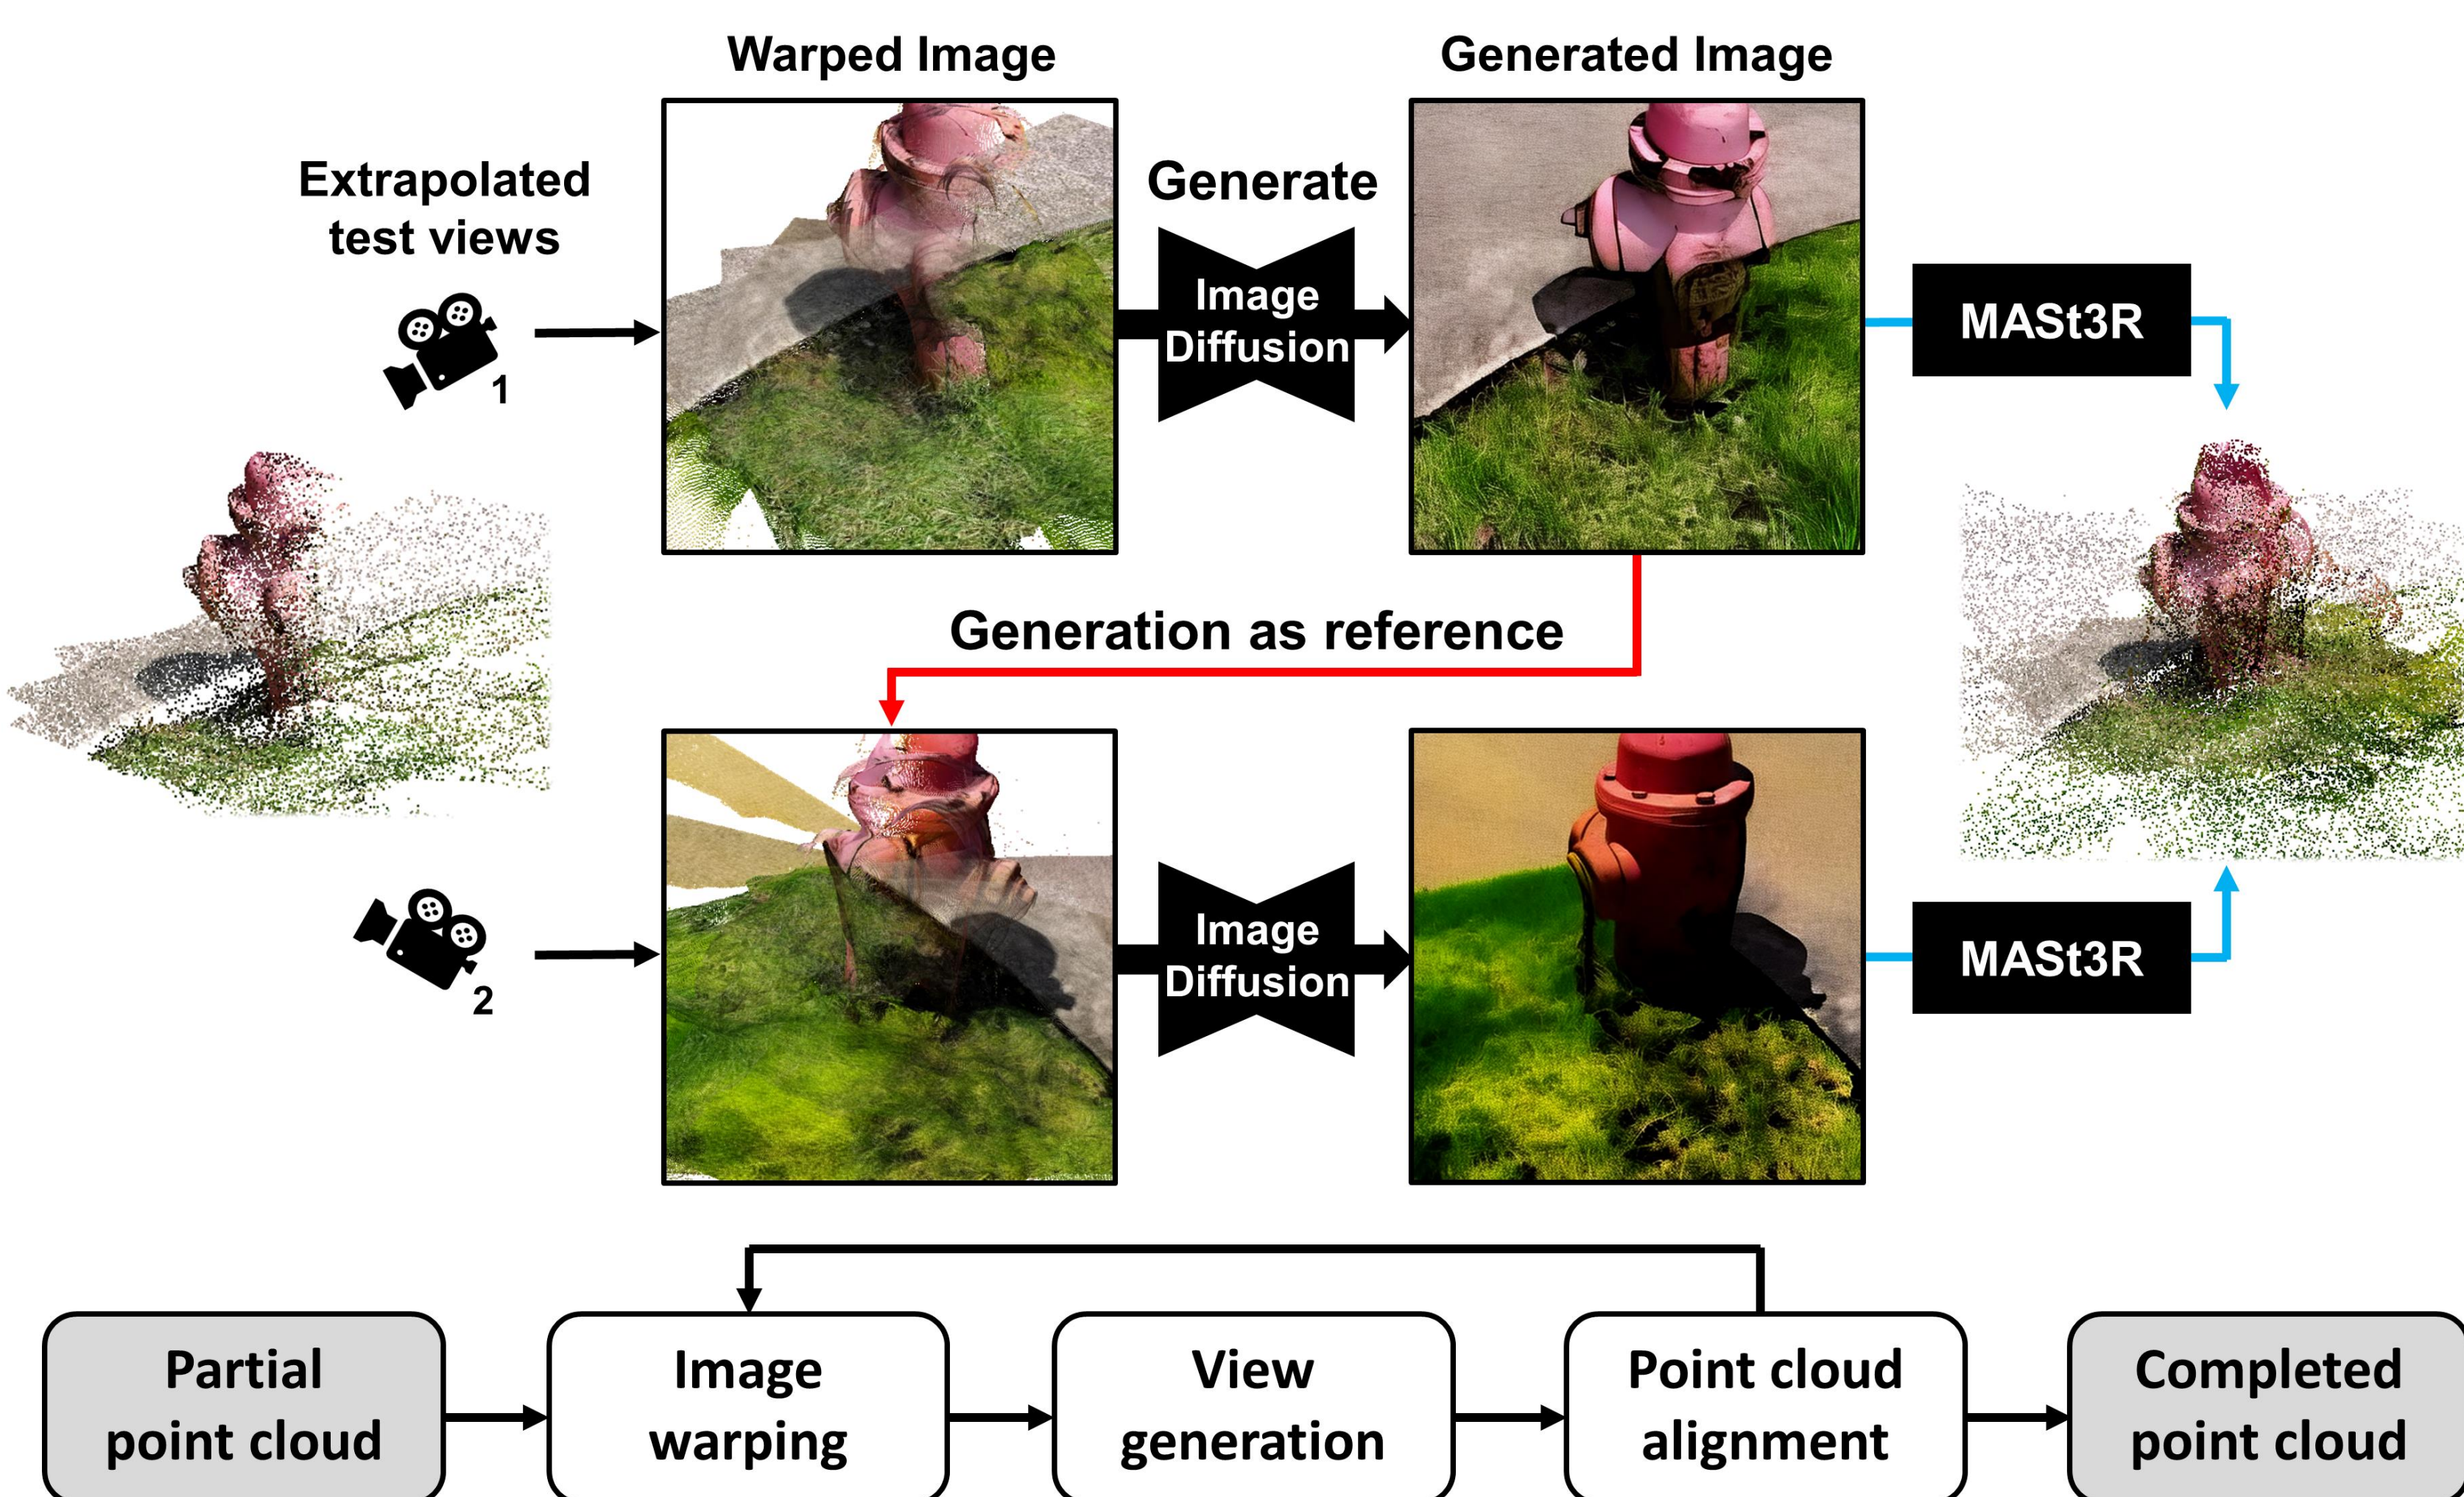

### 1. Depth-aware Warped Image Generation

$$I_{warp} = H_{warp} I_{ref} = K P_{query} P_{ref}^{-1} D_{ref} K^{-1} I_{ref}$$

### 2. Warped Image-conditioned Diffusion

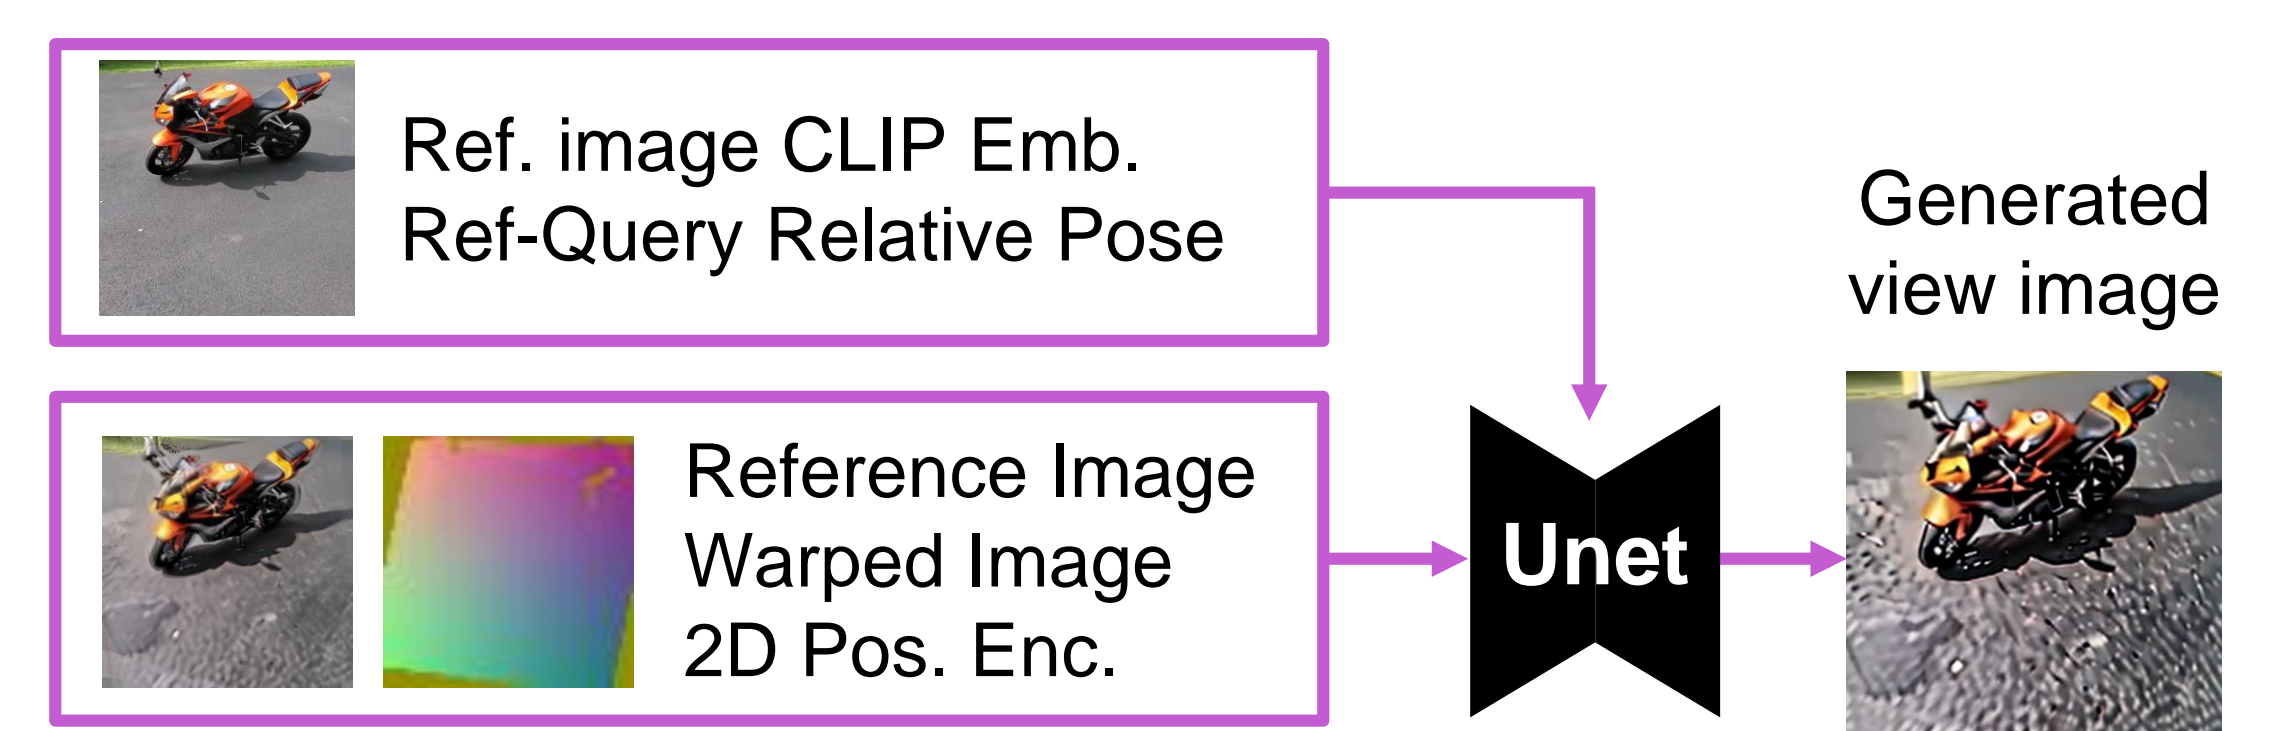

- Fine-tune **ZeroNVS<sup>3</sup>** model to generate views
- Add warped Image / Positional Encoding inputs
- **Per-scene LoRA** via cross-input view generation

### 3. Incremental 3D Reconstruction

- Optimize only the new images' **depth maps**

## Results

|                 |              | LPIPS ↓      |              | DISTS ↓      |              | Masked PSNR ↑ |               | Masked SSIM ↑ |              | Perfrom Time ↓ |        |
|-----------------|--------------|--------------|--------------|--------------|--------------|---------------|---------------|---------------|--------------|----------------|--------|
|                 |              | 3-view       | 6-view       | 3-view       | 6-view       | 3-view        | 6-view        | 3-view        | 6-view       | 3-view         | 6-view |
| 3DGS based      | 3DGS         | 0.707        | 0.640        | 0.385        | 0.351        | 12.759        | 14.342        | 0.583         | 0.621        | 291.7          | 335.7  |
|                 | FSGS         | 0.666        | 0.596        | 0.384        | 0.338        | 14.784        | 15.218        | 0.684         | 0.673        | 108.8          | 118.8  |
|                 | InstantSplat | 0.588        | <b>0.481</b> | 0.327        | 0.276        | <b>16.792</b> | <b>18.149</b> | <b>0.750</b>  | <b>0.753</b> | 71.1           | 103.6  |
| Diffusion based | DN Gaussian  | 0.723        | 0.644        | 0.417        | 0.354        | 13.759        | 14.463        | 0.683         | 0.677        | 159.5          | 141.4  |
|                 | ZeroNVS      | 0.694        | 0.652        | 0.339        | 0.311        | 12.641        | 12.812        | 0.606         | 0.569        | 22.6           | 37.0   |
|                 | MegaScenes   | 0.603        | 0.526        | 0.279        | <b>0.245</b> | 14.352        | 14.783        | 0.646         | 0.631        | 38.0           | 59.3   |
|                 | <b>Ours</b>  | <b>0.577</b> | 0.525        | <b>0.266</b> | 0.246        | 14.397        | 14.694        | 0.645         | 0.616        | 38.5           | 59.4   |

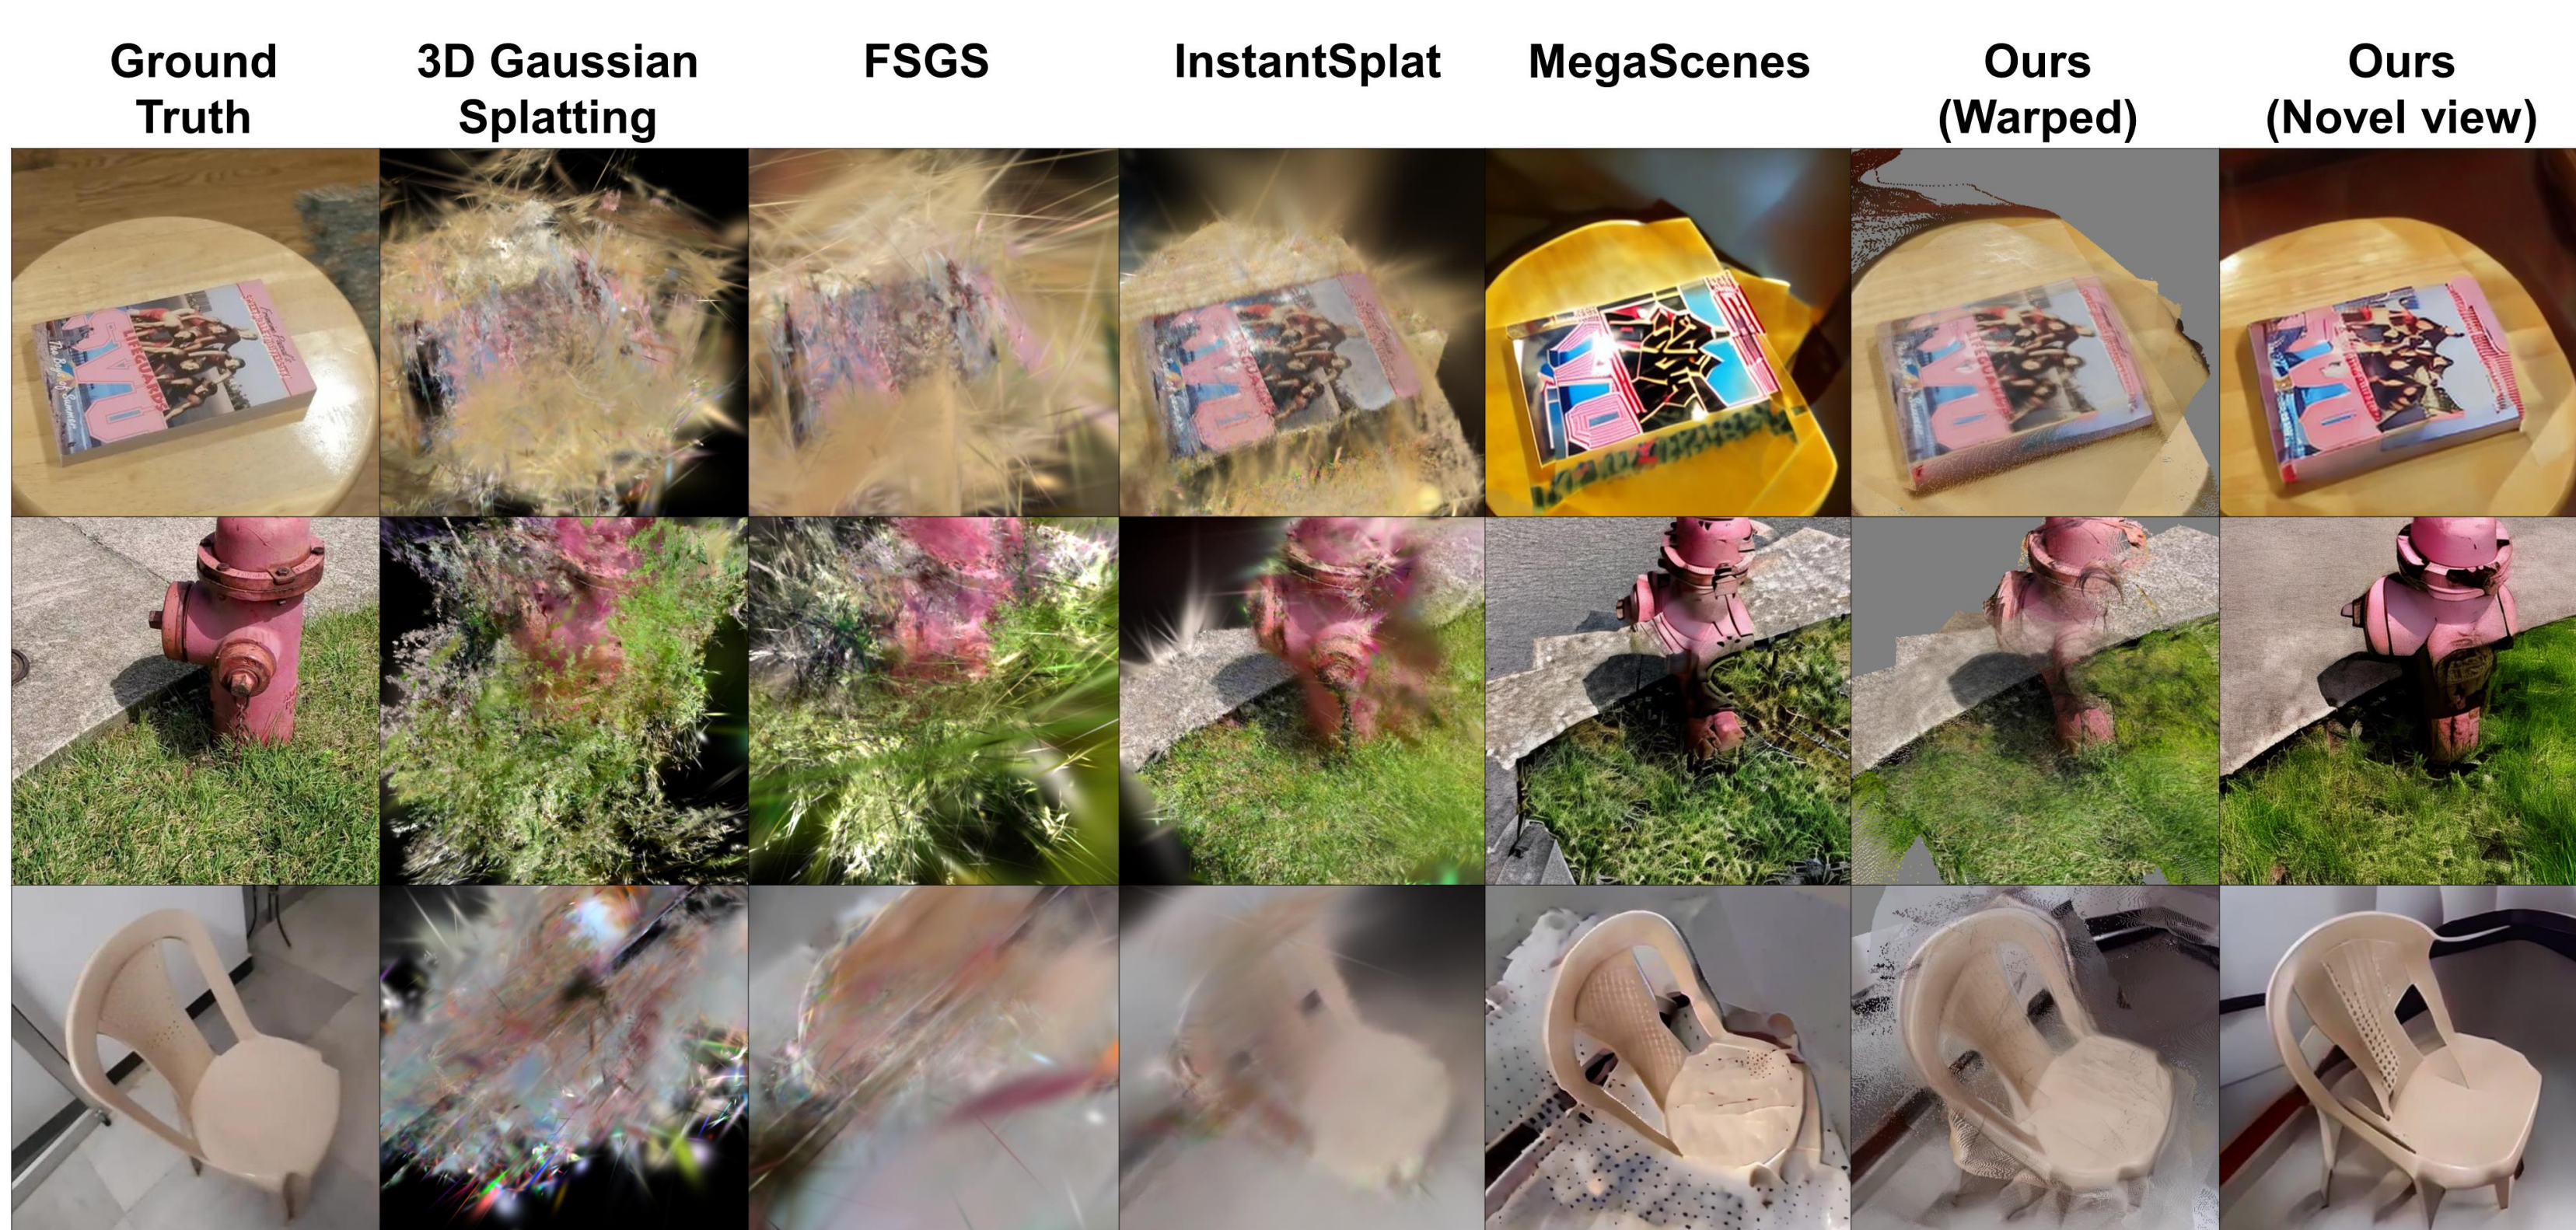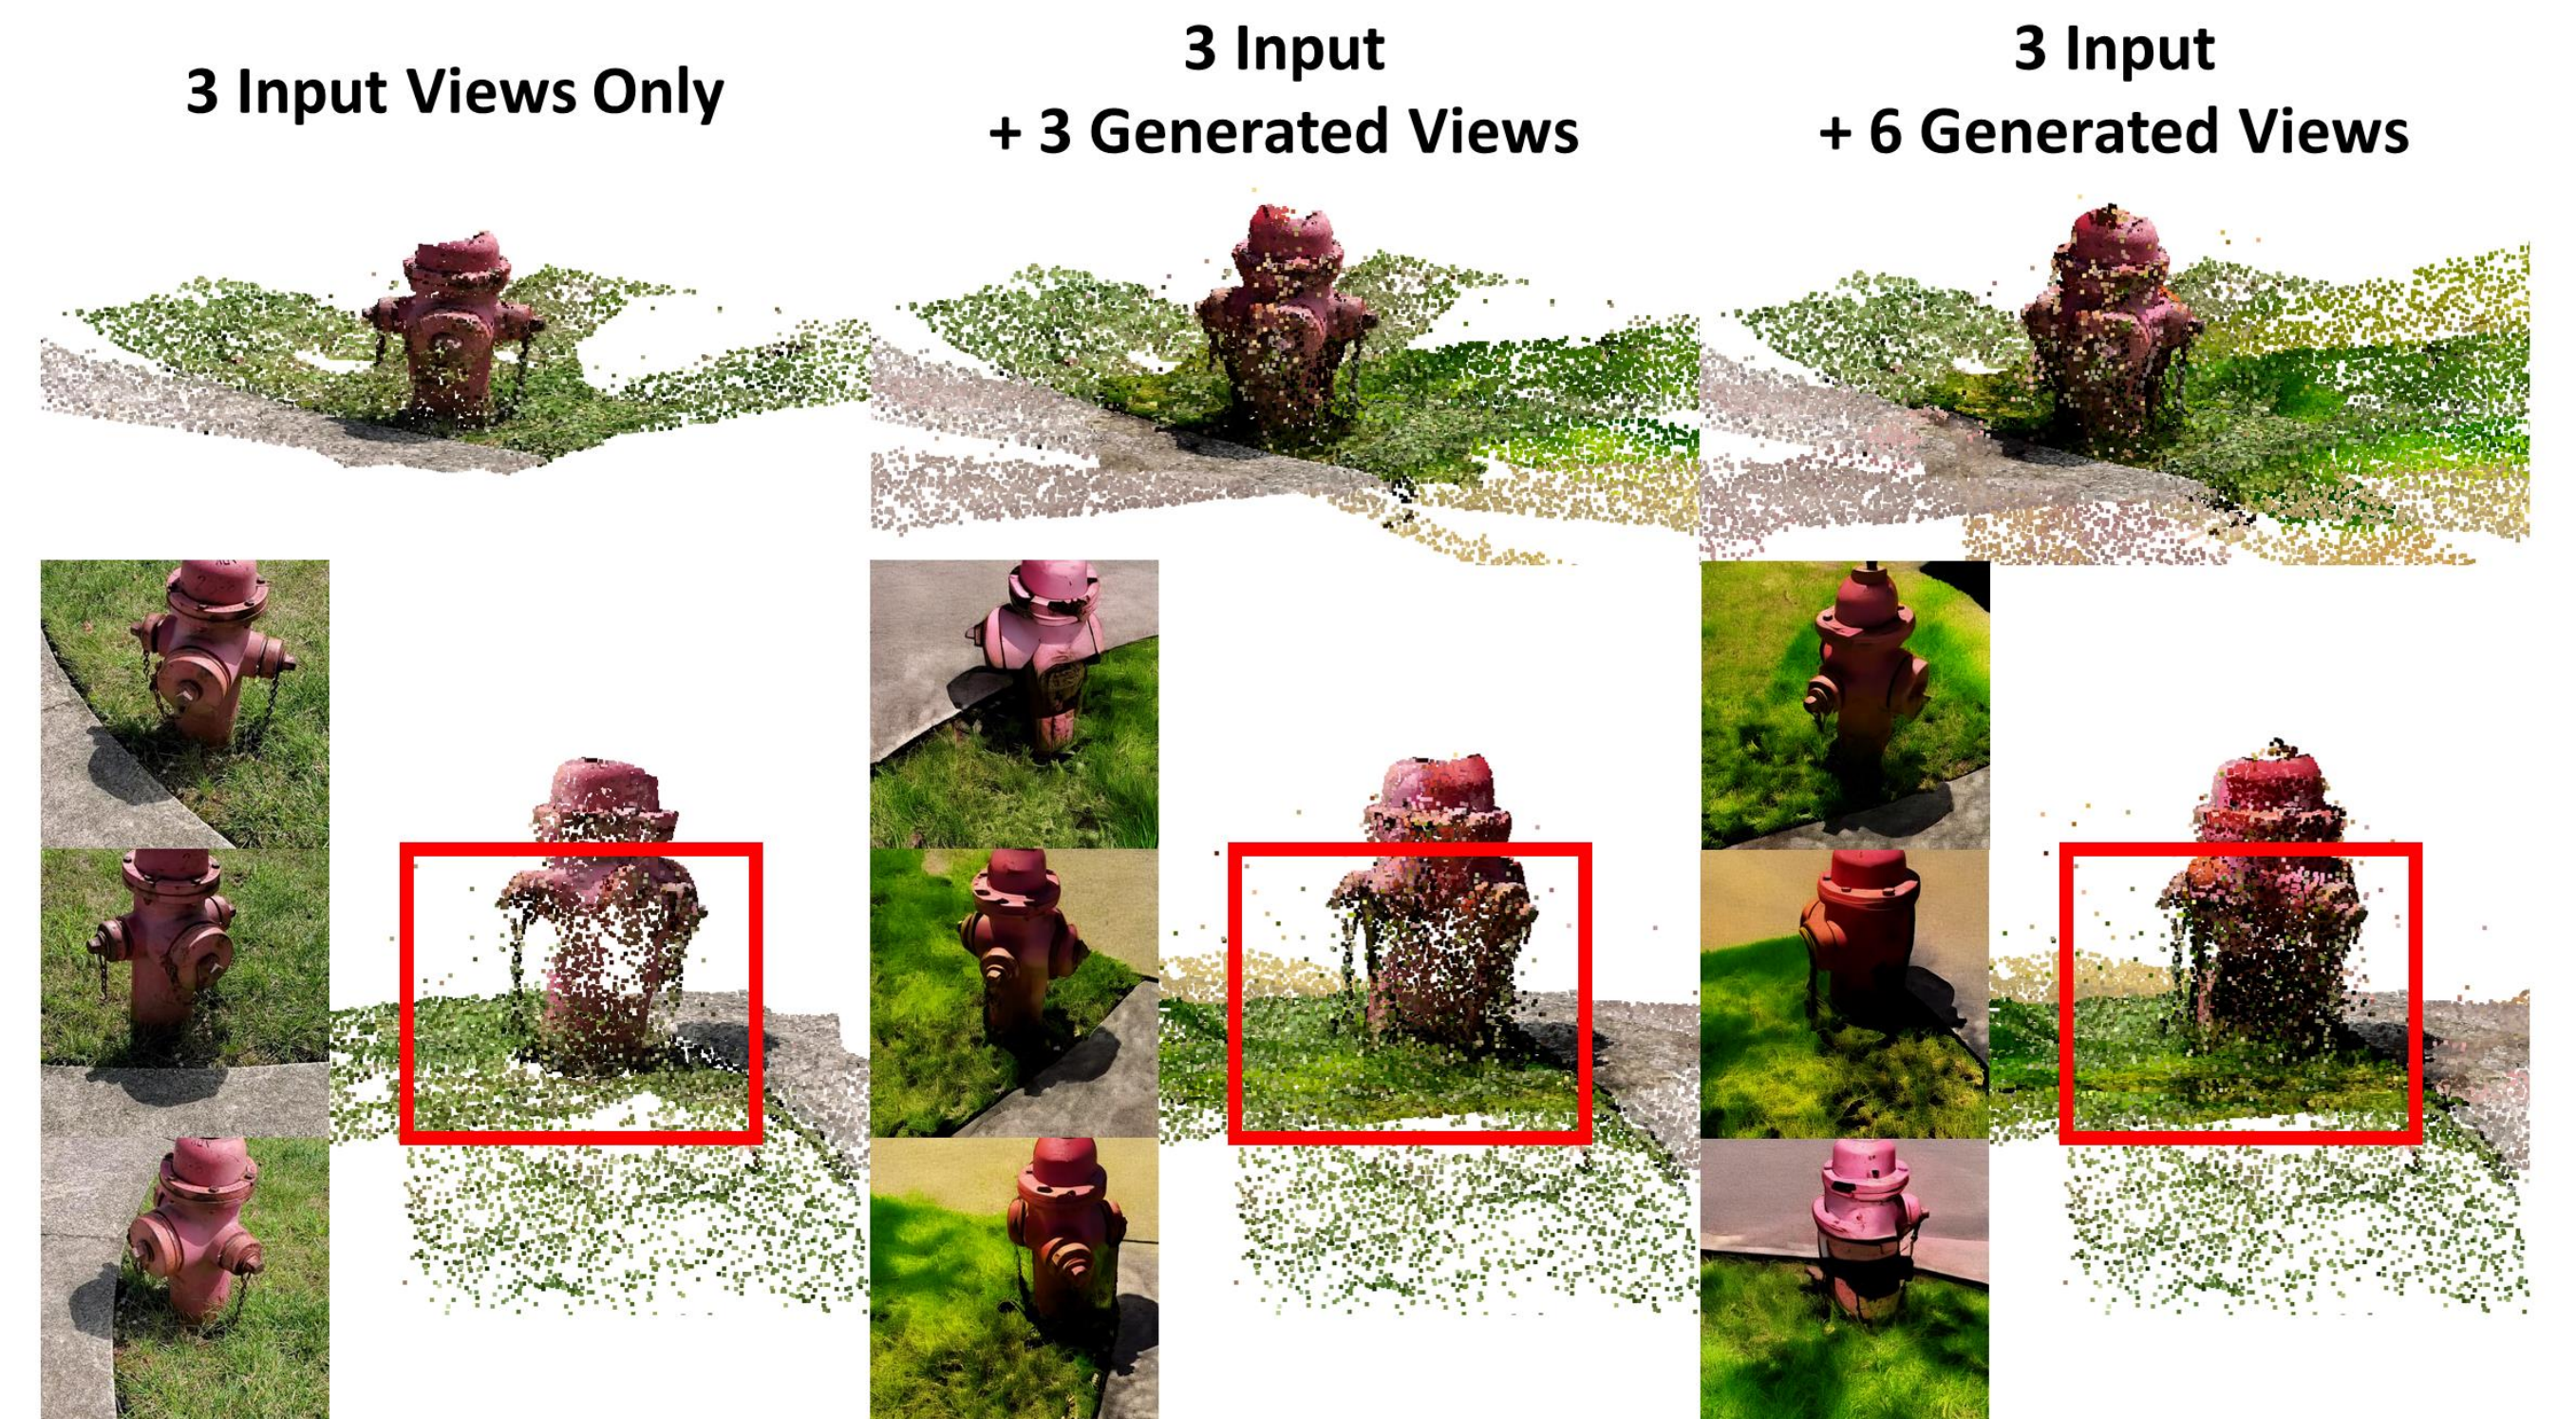

- Proposed method achieves strong results on **LPIPS (realism)** and **DISTS (geometric consistency)**.
- Proposed model can **generate extrapolated views** that 3D reconstruction model can **confidently rely on**.
- Previously **unseen parts** of the scene **are gradually filled in** by the generated views.

\* This work was supported by Institute of Information & communications Technology Planning & Evaluation (IITP) grant funded by the Korea government(MSIT) No. RS-2023-0024175

#### Reference

<sup>1</sup> Kerbl, Bernhard, et al. "3d gaussian splatting for real-time radiance field rendering." *ACM Trans. Graph.* 42.4 (2023): 139-1.

<sup>2</sup> Leroy, Vincent, Yohann Cabon, and Jérôme Revaud. "Grounding image matching in 3d with mast3r." *European Conference on Computer Vision*. Cham: Springer Nature Switzerland, 2024.

<sup>3</sup> Sargent, Kyle, et al. "Zeronvs: Zero-shot 360-degree view synthesis from a single image." *Proceedings of the IEEE/CVF Conference on Computer Vision and Pattern Recognition*. 2024.
